# Supplementary material for: Hydrogen abstraction of carbon/phosphorus-containing radicals in photoassisted polymerization
Source: Royal Society of Chemistry journal article supplement (doi:10.1039/c6ra00156d), 2016-01-01
Supplement: c6ra00156d1.pdf [file c6ra00156d1.pdf]

## Supplemental material for “The hydrogen abstraction of carbon/phosphorus-containing radicals in the photoassisted polymerization &”

Hua ZHOU <sup>1#</sup>, Yugang HUANG <sup>2#</sup>, Yun ZHANG <sup>2#</sup>, Dandan SONG <sup>2</sup>, Hong HUANG <sup>2</sup>, Cheng ZHONG <sup>3</sup>,  
Guodong YE <sup>2\*</sup>

### Abbreviation list

| Abbreviation |                                                     |
|--------------|-----------------------------------------------------|
| TS           | transient state                                     |
| BAPO         | Phenyl bis (2,4,6-trimethylbenzoyl)-phosphine oxide |
| TPO          | diphenyl-(2,4,6-trimethylbenzoyl) phosphine oxide   |
| TPO-L        | ethyl-2,4,6-trimethyl benzoyl phenyl phosphinate    |
| APA          | aroyl-phosphinoyl                                   |
| TMB          | 2,4,6-trimethylbenzaldehyde                         |
| B            | benzaldehyde                                        |
| EL           | 3,6-nonadiene                                       |
| APAR         | aroyl-phosphinoyl radical                           |
| TMBR         | 2,4,6-trimethylbenzoyl radical                      |
| BR           | benzoyl radical                                     |
| ELR          | 3,6-nonadiene radical                               |

### Part I : Data from B3LYP 6-311++g(d,p)

#### BAPO

Standard orientation:

| Center Number | Atomic Number | Atomic Type | Coordinates (Angstroms) |           |           |
|---------------|---------------|-------------|-------------------------|-----------|-----------|
|               |               |             | X                       | Y         | Z         |
| 1             | 15            | 0           | 0.131704                | 0.850834  | -0.425364 |
| 2             | 8             | 0           | 0.033052                | 0.280903  | -1.813436 |
| 3             | 6             | 0           | 2.217422                | -3.509466 | -0.670683 |
| 4             | 6             | 0           | 1.336194                | -2.504584 | -0.269840 |
| 5             | 6             | 0           | 1.859465                | -1.393712 | 0.421416  |
| 6             | 6             | 0           | 3.237971                | -1.305215 | 0.715681  |
| 7             | 6             | 0           | 4.076277                | -2.326025 | 0.268576  |
| 8             | 6             | 0           | 3.589274                | -3.433080 | -0.429135 |
| 9             | 6             | 0           | 0.966966                | -0.291069 | 0.893891  |
| 10            | 8             | 0           | 0.818188                | 0.015876  | 2.054828  |
| 11            | 6             | 0           | 3.826926                | -0.145691 | 1.487202  |
| 12            | 6             | 0           | -0.141775               | -2.661201 | -0.539440 |
| 13            | 6             | 0           | 4.525182                | -4.508019 | -0.923399 |
| 14            | 6             | 0           | 1.707482                | 2.794617  | -1.559396 |

&

<sup>1</sup> Key Laboratory for Major Obstetric Diseases of Guangdong Province, The Third Affiliated Hospital of Guangzhou Medical University, Guangzhou 510150, People's Republic of China

<sup>2</sup> Department of Chemistry, School of Pharmaceutical Sciences, Guangzhou Medical University, Guangzhou 511436, People's Republic of China

<sup>3</sup> College of Chemistry and Molecular Sciences, Wuhan University, Wuhan 430072, People's Republic of China

\* Corresponding author Guodong YE. E-mail: gzhgd@gzhu.edu.cn. Tel.: +86 13229494539. Fax: +86 2037103263.

# These authors contributed to the work equally and should be regarded as co-first authors

|                                              |    |           |           |                             |           |
|----------------------------------------------|----|-----------|-----------|-----------------------------|-----------|
| 15                                           | 6  | 0         | 2.504349  | 3.936788                    | -1.589066 |
| 16                                           | 6  | 0         | 2.756241  | 4.642710                    | -0.413859 |
| 17                                           | 6  | 0         | 2.214302  | 4.205138                    | 0.794802  |
| 18                                           | 6  | 0         | 1.417801  | 3.063591                    | 0.835827  |
| 19                                           | 6  | 0         | 1.158977  | 2.357227                    | -0.346836 |
| 20                                           | 1  | 0         | 1.815974  | -4.377196                   | -1.184983 |
| 21                                           | 1  | 0         | 5.139252  | -2.256410                   | 0.478745  |
| 22                                           | 1  | 0         | 4.915815  | -0.213852                   | 1.499082  |
| 23                                           | 1  | 0         | 3.473646  | -0.138211                   | 2.520932  |
| 24                                           | 1  | 0         | 3.556978  | 0.818188                    | 1.047677  |
| 25                                           | 1  | 0         | -0.357085 | -3.665855                   | -0.907472 |
| 26                                           | 1  | 0         | -0.738565 | -2.508293                   | 0.364395  |
| 27                                           | 1  | 0         | -0.475510 | -1.941648                   | -1.290905 |
| 28                                           | 1  | 0         | 4.019410  | -5.473015                   | -1.000853 |
| 29                                           | 1  | 0         | 5.385318  | -4.624485                   | -0.259946 |
| 30                                           | 1  | 0         | 4.910338  | -4.258761                   | -1.918329 |
| 31                                           | 1  | 0         | 1.504797  | 2.233801                    | -2.464439 |
| 32                                           | 1  | 0         | 2.927540  | 4.273374                    | -2.528795 |
| 33                                           | 1  | 0         | 3.376002  | 5.532261                    | -0.438375 |
| 34                                           | 1  | 0         | 2.409794  | 4.754602                    | 1.708713  |
| 35                                           | 1  | 0         | 0.998209  | 2.728721                    | 1.774526  |
| 36                                           | 1  | 0         | -6.811111 | -1.743689                   | -1.168905 |
| 37                                           | 6  | 0         | -6.129703 | -2.140428                   | -0.412829 |
| 38                                           | 6  | 0         | -4.963931 | -1.211836                   | -0.179477 |
| 39                                           | 1  | 0         | -6.697366 | -2.307395                   | 0.505408  |
| 40                                           | 1  | 0         | -5.782303 | -3.117646                   | -0.766129 |
| 41                                           | 6  | 0         | -4.476326 | -0.401109                   | -1.205817 |
| 42                                           | 6  | 0         | -4.338908 | -1.145582                   | 1.066154  |
| 43                                           | 6  | 0         | -3.364748 | 0.424409                    | -1.034959 |
| 44                                           | 1  | 0         | -4.978313 | -0.403291                   | -2.168517 |
| 45                                           | 6  | 0         | -3.241503 | -0.315673                   | 1.303223  |
| 46                                           | 1  | 0         | -4.722880 | -1.745886                   | 1.885441  |
| 47                                           | 6  | 0         | -2.731966 | 0.442204                    | 0.225770  |
| 48                                           | 6  | 0         | -2.925624 | 1.322537                    | -2.168191 |
| 49                                           | 6  | 0         | -2.666373 | -0.240834                   | 2.700029  |
| 50                                           | 6  | 0         | -1.529977 | 1.300531                    | 0.473549  |
| 51                                           | 1  | 0         | -3.641162 | 1.271957                    | -2.990745 |
| 52                                           | 1  | 0         | -1.942902 | 1.030518                    | -2.545776 |
| 53                                           | 1  | 0         | -2.866819 | 2.367199                    | -1.846832 |
| 54                                           | 1  | 0         | -3.028498 | -1.076341                   | 3.301853  |
| 55                                           | 1  | 0         | -1.575608 | -0.256798                   | 2.714924  |
| 56                                           | 1  | 0         | -2.973400 | 0.686796                    | 3.191202  |
| 57                                           | 8  | 0         | -1.491377 | 2.192156                    | 1.284786  |
| -----                                        |    |           |           |                             |           |
| Zero-point correction=                       |    |           |           | 0.459077 (Hartree/Particle) |           |
| Thermal correction to Energy=                |    |           |           | 0.490833                    |           |
| Thermal correction to Enthalpy=              |    |           |           | 0.491777                    |           |
| Thermal correction to Gibbs Free Energy=     |    |           |           | 0.392047                    |           |
| Sum of electronic and zero-point Energies=   |    |           |           | -1573.967529                |           |
| Sum of electronic and thermal Energies=      |    |           |           | -1573.935773                |           |
| Sum of electronic and thermal Enthalpies=    |    |           |           | -1573.934829                |           |
| Sum of electronic and thermal Free Energies= |    |           |           | -1574.034559                |           |
| Excited State                                | 1: | Triplet-A | 2.5373 eV | 488.64 nm                   | f=0.0000  |
| Excited State                                | 3: | Singlet-A | 3.0223 eV | 410.23 nm                   | f=0.0176  |

**TPO**

Standard orientation:

| Center<br>Number                | Atomic<br>Number | Atomic<br>Type | Coordinates (Angstroms) |           |           |
|---------------------------------|------------------|----------------|-------------------------|-----------|-----------|
|                                 |                  |                | X                       | Y         | Z         |
| 1                               | 15               | 0              | -0.803490               | -0.103257 | -0.580352 |
| 2                               | 8                | 0              | -0.325368               | -0.357148 | -1.981764 |
| 3                               | 6                | 0              | 3.837783                | -1.439766 | -0.505308 |
| 4                               | 6                | 0              | 2.473317                | -1.374496 | -0.222704 |
| 5                               | 6                | 0              | 1.979675                | -0.235595 | 0.446211  |
| 6                               | 6                | 0              | 2.849350                | 0.811590  | 0.828430  |
| 7                               | 6                | 0              | 4.198102                | 0.708990  | 0.489826  |
| 8                               | 6                | 0              | 4.713166                | -0.404611 | -0.176453 |
| 9                               | 6                | 0              | 0.535197                | -0.116603 | 0.799047  |
| 10                              | 8                | 0              | 0.133135                | 0.099971  | 1.924139  |
| 11                              | 6                | 0              | 2.371200                | 2.037797  | 1.573784  |
| 12                              | 6                | 0              | 1.587880                | -2.538844 | -0.602203 |
| 13                              | 6                | 0              | 6.173291                | -0.477057 | -0.547835 |
| 14                              | 6                | 0              | -1.446746               | 2.384752  | -1.554222 |
| 15                              | 6                | 0              | -1.965338               | 3.678348  | -1.527537 |
| 16                              | 6                | 0              | -2.540037               | 4.176288  | -0.360247 |
| 17                              | 6                | 0              | -2.597352               | 3.379587  | 0.783896  |
| 18                              | 6                | 0              | -2.083098               | 2.085858  | 0.763802  |
| 19                              | 6                | 0              | -1.506296               | 1.582477  | -0.408773 |
| 20                              | 1                | 0              | 4.225051                | -2.326996 | -0.996808 |
| 21                              | 1                | 0              | 4.867008                | 1.519414  | 0.762969  |
| 22                              | 1                | 0              | 3.158387                | 2.793177  | 1.597898  |
| 23                              | 1                | 0              | 2.098534                | 1.793439  | 2.602901  |
| 24                              | 1                | 0              | 1.489876                | 2.486482  | 1.108696  |
| 25                              | 1                | 0              | 2.193290                | -3.420560 | -0.820386 |
| 26                              | 1                | 0              | 0.894346                | -2.807797 | 0.199303  |
| 27                              | 1                | 0              | 0.998648                | -2.296755 | -1.490405 |
| 28                              | 1                | 0              | 6.524958                | -1.510566 | -0.584443 |
| 29                              | 1                | 0              | 6.794543                | 0.071293  | 0.164037  |
| 30                              | 1                | 0              | 6.343246                | -0.038247 | -1.537288 |
| 31                              | 1                | 0              | -0.997233               | 1.981249  | -2.454078 |
| 32                              | 1                | 0              | -1.919315               | 4.294578  | -2.418467 |
| 33                              | 1                | 0              | -2.943198               | 5.182747  | -0.339789 |
| 34                              | 1                | 0              | -3.043514               | 3.766013  | 1.693396  |
| 35                              | 1                | 0              | -2.124610               | 1.479958  | 1.659498  |
| 36                              | 6                | 0              | -4.021601               | -3.220934 | 0.564005  |
| 37                              | 6                | 0              | -3.594233               | -3.055078 | -0.751968 |
| 38                              | 6                | 0              | -3.467190               | -2.441857 | 1.578972  |
| 39                              | 6                | 0              | -2.615898               | -2.110640 | -1.055274 |
| 40                              | 1                | 0              | -4.018072               | -3.663228 | -1.543249 |
| 41                              | 6                | 0              | -2.492349               | -1.491560 | 1.283107  |
| 42                              | 1                | 0              | -3.790827               | -2.575665 | 2.605138  |
| 43                              | 6                | 0              | -2.065410               | -1.318095 | -0.040163 |
| 44                              | 1                | 0              | -4.781166               | -3.957988 | 0.799933  |
| 45                              | 1                | 0              | -2.266782               | -1.981539 | -2.073212 |
| 46                              | 1                | 0              | -2.053436               | -0.906046 | 2.080273  |
| Zero-point correction=          |                  |                | 0.368401                |           |           |
| (Hartree/Particle)              |                  |                |                         |           |           |
| Thermal correction to Energy=   |                  |                | 0.392573                |           |           |
| Thermal correction to Enthalpy= |                  |                | 0.393517                |           |           |

Thermal correction to Gibbs Free Energy= 0.311866  
 Sum of electronic and zero-point Energies= -1342.733643  
 Sum of electronic and thermal Energies= -1342.709471  
 Sum of electronic and thermal Enthalpies= -1342.708527  
 Sum of electronic and thermal Free Energies= -1342.790177  
 SCF Done: E(RB+HF-LYP) = -1343.10204353

Excited State 1: Triplet-A 2.6707 eV 464.24 nm f=0.0000  
 Excited State 3: Singlet-A 3.1743 eV 390.59 nm f=0.0084

### TPO-L

Standard orientation:

| Center<br>Number | Atomic<br>Number | Atomic<br>Type | Coordinates (Angstroms) |           |           |
|------------------|------------------|----------------|-------------------------|-----------|-----------|
|                  |                  |                | X                       | Y         | Z         |
| 1                | 15               | 0              | -0.946200               | 0.652123  | 0.623100  |
| 2                | 8                | 0              | -0.440543               | 0.752349  | 2.018354  |
| 3                | 6                | 0              | 3.897652                | 0.692888  | 0.585479  |
| 4                | 6                | 0              | 2.564533                | 1.004913  | 0.317468  |
| 5                | 6                | 0              | 1.786309                | 0.067535  | -0.392861 |
| 6                | 6                | 0              | 2.347529                | -1.153215 | -0.831264 |
| 7                | 6                | 0              | 3.675491                | -1.427339 | -0.506327 |
| 8                | 6                | 0              | 4.467707                | -0.520740 | 0.200577  |
| 9                | 6                | 0              | 0.362682                | 0.354667  | -0.733872 |
| 10               | 8                | 0              | -0.074124               | 0.325806  | -1.869170 |
| 11               | 6                | 0              | 1.558864                | -2.173293 | -1.622267 |
| 12               | 6                | 0              | 2.019983                | 2.345343  | 0.752780  |
| 13               | 6                | 0              | 5.895385                | -0.853693 | 0.555686  |
| 14               | 6                | 0              | -2.653587               | -1.250055 | 1.615602  |
| 15               | 6                | 0              | -3.596672               | -2.274075 | 1.575713  |
| 16               | 6                | 0              | -4.047324               | -2.762202 | 0.350379  |
| 17               | 6                | 0              | -3.551623               | -2.227120 | -0.838087 |
| 18               | 6                | 0              | -2.611073               | -1.199683 | -0.806649 |
| 19               | 6                | 0              | -2.160976               | -0.699743 | 0.423959  |
| 20               | 1                | 0              | 4.506463                | 1.422642  | 1.110377  |
| 21               | 1                | 0              | 4.105174                | -2.373163 | -0.822139 |
| 22               | 1                | 0              | 2.113132                | -3.111140 | -1.685793 |
| 23               | 1                | 0              | 1.363790                | -1.821563 | -2.637945 |
| 24               | 1                | 0              | 0.589060                | -2.388373 | -1.166326 |
| 25               | 1                | 0              | 2.836820                | 3.015873  | 1.025740  |
| 26               | 1                | 0              | 1.444672                | 2.831787  | -0.039639 |
| 27               | 1                | 0              | 1.362108                | 2.231695  | 1.617897  |
| 28               | 1                | 0              | 6.508218                | 0.047312  | 0.631590  |
| 29               | 1                | 0              | 6.348364                | -1.514436 | -0.187071 |
| 30               | 1                | 0              | 5.944366                | -1.365447 | 1.523220  |
| 31               | 1                | 0              | -2.283717               | -0.872891 | 2.561851  |
| 32               | 1                | 0              | -3.973571               | -2.694331 | 2.501309  |
| 33               | 1                | 0              | -4.778226               | -3.562702 | 0.320591  |
| 34               | 1                | 0              | -3.894506               | -2.611619 | -1.792110 |
| 35               | 1                | 0              | -2.220743               | -0.799774 | -1.733803 |
| 36               | 8                | 0              | -1.643622               | 2.036217  | 0.142398  |
| 37               | 6                | 0              | -3.008585               | 3.689907  | -0.921428 |
| 38               | 6                | 0              | -2.560094               | 2.242399  | -0.960852 |
| 39               | 1                | 0              | -2.156014               | 4.363152  | -1.032296 |

|    |   |   |           |          |           |
|----|---|---|-----------|----------|-----------|
| 40 | 1 | 0 | -3.708758 | 3.880390 | -1.739969 |
| 41 | 1 | 0 | -3.507879 | 3.915107 | 0.023151  |
| 42 | 1 | 0 | -3.410202 | 1.564242 | -0.845964 |
| 43 | 1 | 0 | -2.046462 | 2.007472 | -1.896036 |

-----

Zero-point correction= 0.348644  
(Hartree/Particle)  
Thermal correction to Energy= 0.372130  
Thermal correction to Enthalpy= 0.373074  
Thermal correction to Gibbs Free Energy= 0.293304  
Sum of electronic and zero-point Energies= -1265.555980  
Sum of electronic and thermal Energies= -1265.532495  
Sum of electronic and thermal Enthalpies= -1265.531551  
Sum of electronic and thermal Free Energies= -1265.611321  
SCF Done: E(RB+HF-LYP) = -1265.90462459

Excited State 1: Triplet-A 2.6221 eV 472.84 nm f=0.0000 <S\*\*2>=2.000  
Excited State 3: Singlet-A 3.1502 eV 393.58 nm f=0.0043 <S\*\*2>=0.000

### APAR(from BAPO)

Standard orientation:

-----

| Center<br>Number | Atomic<br>Number | Atomic<br>Type | Coordinates (Angstroms) |           |           |
|------------------|------------------|----------------|-------------------------|-----------|-----------|
|                  |                  |                | X                       | Y         | Z         |
| 1                | 15               | 0              | -1.062162               | 0.000359  | 0.993493  |
| 2                | 8                | 0              | -0.671407               | -1.319634 | 1.620666  |
| 3                | 6                | 0              | 3.284338                | -1.342762 | -0.562743 |
| 4                | 6                | 0              | 1.933407                | -0.995510 | -0.612136 |
| 5                | 6                | 0              | 1.566493                | 0.310274  | -0.236328 |
| 6                | 6                | 0              | 2.535897                | 1.248853  | 0.177526  |
| 7                | 6                | 0              | 3.867626                | 0.840814  | 0.234608  |
| 8                | 6                | 0              | 4.263277                | -0.448473 | -0.129623 |
| 9                | 6                | 0              | 0.139664                | 0.746588  | -0.297352 |
| 10               | 8                | 0              | -0.281627               | 1.649199  | -0.984029 |
| 11               | 6                | 0              | 2.169693                | 2.663946  | 0.562727  |
| 12               | 6                | 0              | 0.921524                | -2.010074 | -1.090078 |
| 13               | 6                | 0              | 5.709670                | -0.866956 | -0.037439 |
| 14               | 6                | 0              | -3.538601               | -1.140160 | 0.560518  |
| 15               | 6                | 0              | -4.855204               | -1.181061 | 0.112689  |
| 16               | 6                | 0              | -5.395605               | -0.094790 | -0.575709 |
| 17               | 6                | 0              | -4.616773               | 1.037593  | -0.814663 |
| 18               | 6                | 0              | -3.299618               | 1.092610  | -0.368205 |
| 19               | 6                | 0              | -2.749575               | -0.006356 | 0.311269  |
| 20               | 1                | 0              | 4.617748                | 1.553175  | 0.564457  |
| 21               | 1                | 0              | 3.576391                | -2.341247 | -0.873180 |
| 22               | 1                | 0              | 3.036975                | 3.182101  | 0.974448  |
| 23               | 1                | 0              | 1.376173                | 2.689766  | 1.315429  |
| 24               | 1                | 0              | 1.810474                | 3.229193  | -0.300445 |
| 25               | 1                | 0              | 1.419161                | -2.825420 | -1.617992 |
| 26               | 1                | 0              | 0.374789                | -2.435115 | -0.243599 |
| 27               | 1                | 0              | 0.191013                | -1.570312 | -1.774400 |
| 28               | 1                | 0              | 5.940589                | -1.243863 | 0.964969  |
| 29               | 1                | 0              | 6.381388                | -0.028003 | -0.233556 |
| 30               | 1                | 0              | 5.940642                | -1.663496 | -0.747997 |

|    |   |   |           |           |           |
|----|---|---|-----------|-----------|-----------|
| 31 | 1 | 0 | -3.110582 | -1.977906 | 1.098339  |
| 32 | 1 | 0 | -5.459324 | -2.061580 | 0.300409  |
| 33 | 1 | 0 | -6.422326 | -0.129173 | -0.922421 |
| 34 | 1 | 0 | -5.036233 | 1.882619  | -1.348804 |
| 35 | 1 | 0 | -2.697452 | 1.970148  | -0.561518 |

---

|                                              |                             |
|----------------------------------------------|-----------------------------|
| Zero-point correction=                       | 0.276092 (Hartree/Particle) |
| Thermal correction to Energy=                | 0.295415                    |
| Thermal correction to Enthalpy=              | 0.296359                    |
| Thermal correction to Gibbs Free Energy=     | 0.225443                    |
| Sum of electronic and zero-point Energies=   | -1111.081260                |
| Sum of electronic and thermal Energies=      | -1111.061938                |
| Sum of electronic and thermal Enthalpies=    | -1111.060994                |
| Sum of electronic and thermal Free Energies= | -1111.131909                |

### APA (from BAPO)

Standard orientation:

---

| Center<br>Number | Atomic<br>Number | Atomic<br>Type | Coordinates (Angstroms) |           |           |
|------------------|------------------|----------------|-------------------------|-----------|-----------|
|                  |                  |                | X                       | Y         | Z         |
| 1                | 15               | 0              | 1.181572                | 1.637169  | 0.107056  |
| 2                | 8                | 0              | 0.764812                | 2.354410  | -1.141669 |
| 3                | 6                | 0              | -3.494301               | 0.446416  | -0.524342 |
| 4                | 6                | 0              | -2.337924               | 1.011949  | 0.013729  |
| 5                | 6                | 0              | -1.368804               | 0.152165  | 0.571997  |
| 6                | 6                | 0              | -1.574693               | -1.246007 | 0.606278  |
| 7                | 6                | 0              | -2.735305               | -1.758076 | 0.027755  |
| 8                | 6                | 0              | -3.704716               | -0.932571 | -0.545775 |
| 9                | 6                | 0              | -0.116432               | 0.699012  | 1.166411  |
| 10               | 8                | 0              | 0.255597                | 0.487400  | 2.301085  |
| 11               | 6                | 0              | -0.582431               | -2.197690 | 1.235671  |
| 12               | 6                | 0              | -2.191548               | 2.515829  | 0.039802  |
| 13               | 6                | 0              | -4.937857               | -1.519818 | -1.185799 |
| 14               | 6                | 0              | 2.712873                | 0.007391  | -1.512681 |
| 15               | 6                | 0              | 3.666768                | -0.968299 | -1.796934 |
| 16               | 6                | 0              | 4.350294                | -1.600208 | -0.759808 |
| 17               | 6                | 0              | 4.083149                | -1.257873 | 0.566675  |
| 18               | 6                | 0              | 3.130749                | -0.285216 | 0.858708  |
| 19               | 6                | 0              | 2.441703                | 0.347779  | -0.183425 |
| 20               | 1                | 0              | 1.733918                | 2.437115  | 1.140299  |
| 21               | 1                | 0              | -4.252932               | 1.105983  | -0.934050 |
| 22               | 1                | 0              | -2.889346               | -2.832844 | 0.032885  |
| 23               | 1                | 0              | -0.842628               | -3.229010 | 0.991929  |
| 24               | 1                | 0              | -0.573381               | -2.094553 | 2.323202  |
| 25               | 1                | 0              | 0.438293                | -2.018009 | 0.889346  |
| 26               | 1                | 0              | -3.124126               | 2.992948  | -0.266108 |
| 27               | 1                | 0              | -1.952383               | 2.878763  | 1.044352  |
| 28               | 1                | 0              | -1.397583               | 2.845919  | -0.634792 |
| 29               | 1                | 0              | -5.768262               | -0.810549 | -1.177828 |
| 30               | 1                | 0              | -5.258813               | -2.429518 | -0.672936 |
| 31               | 1                | 0              | -4.742393               | -1.784896 | -2.230713 |
| 32               | 1                | 0              | 2.182089                | 0.517261  | -2.308637 |
| 33               | 1                | 0              | 3.878028                | -1.230651 | -2.827405 |
| 34               | 1                | 0              | 5.093870                | -2.357141 | -0.983193 |

|    |   |   |          |           |          |
|----|---|---|----------|-----------|----------|
| 35 | 1 | 0 | 4.618909 | -1.746166 | 1.372820 |
| 36 | 1 | 0 | 2.920723 | -0.025364 | 1.890081 |

---

|                                              |                             |
|----------------------------------------------|-----------------------------|
| Zero-point correction=                       | 0.286557 (Hartree/Particle) |
| Thermal correction to Energy=                | 0.305809                    |
| Thermal correction to Enthalpy=              | 0.306753                    |
| Thermal correction to Gibbs Free Energy=     | 0.236623                    |
| Sum of electronic and zero-point Energies=   | -1111.699760                |
| Sum of electronic and thermal Energies=      | -1111.680508                |
| Sum of electronic and thermal Enthalpies=    | -1111.679563                |
| Sum of electronic and thermal Free Energies= | -1111.749694                |

**TMBR**

Standard orientation:

---

| Center<br>Number | Atomic<br>Number | Atomic<br>Type | Coordinates (Angstroms) |           |           |
|------------------|------------------|----------------|-------------------------|-----------|-----------|
|                  |                  |                | X                       | Y         | Z         |
| 1                | 6                | 0              | -1.432102               | 1.068732  | -0.009322 |
| 2                | 6                | 0              | -0.061271               | 1.314104  | -0.000907 |
| 3                | 6                | 0              | 0.825652                | 0.212776  | 0.003025  |
| 4                | 6                | 0              | 0.330791                | -1.116633 | -0.002945 |
| 5                | 6                | 0              | -1.050474               | -1.304358 | -0.011042 |
| 6                | 6                | 0              | -1.945591               | -0.231121 | -0.011225 |
| 7                | 6                | 0              | 2.267000                | 0.501009  | 0.012704  |
| 8                | 8                | 0              | 3.210889                | -0.225602 | 0.006863  |
| 9                | 6                | 0              | 1.243141                | -2.315886 | -0.004032 |
| 10               | 6                | 0              | 0.446646                | 2.736425  | -0.003721 |
| 11               | 6                | 0              | -3.433946               | -0.470305 | 0.014014  |
| 12               | 1                | 0              | -2.118231               | 1.909765  | -0.015761 |
| 13               | 1                | 0              | -1.439893               | -2.317851 | -0.019083 |
| 14               | 1                | 0              | 0.659132                | -3.237750 | -0.007071 |
| 15               | 1                | 0              | 1.897871                | -2.321031 | 0.870904  |
| 16               | 1                | 0              | 1.901027                | -2.317117 | -0.876604 |
| 17               | 1                | 0              | -0.387053               | 3.439987  | 0.035691  |
| 18               | 1                | 0              | 1.100492                | 2.928837  | 0.849965  |
| 19               | 1                | 0              | 1.030824                | 2.948389  | -0.902785 |
| 20               | 1                | 0              | -3.694665               | -1.419870 | -0.458097 |
| 21               | 1                | 0              | -3.975379               | 0.328613  | -0.497346 |
| 22               | 1                | 0              | -3.800313               | -0.505614 | 1.045998  |

---

|                                              |                             |
|----------------------------------------------|-----------------------------|
| Zero-point correction=                       | 0.178854 (Hartree/Particle) |
| Thermal correction to Energy=                | 0.190638                    |
| Thermal correction to Enthalpy=              | 0.191582                    |
| Thermal correction to Gibbs Free Energy=     | 0.138958                    |
| Sum of electronic and zero-point Energies=   | -462.819494                 |
| Sum of electronic and thermal Energies=      | -462.807710                 |
| Sum of electronic and thermal Enthalpies=    | -462.806766                 |
| Sum of electronic and thermal Free Energies= | -462.859390                 |

**TMB**

Standard orientation:

| Center Number | Atomic Number | Atomic Type | Coordinates (Angstroms) |           |           |
|---------------|---------------|-------------|-------------------------|-----------|-----------|
|               |               |             | X                       | Y         | Z         |
| 1             | 6             | 0           | -1.452393               | 1.060414  | -0.009701 |
| 2             | 6             | 0           | -0.081176               | 1.304370  | -0.002911 |
| 3             | 6             | 0           | 0.815239                | 0.204369  | 0.001025  |
| 4             | 6             | 0           | 0.307330                | -1.120923 | -0.004206 |
| 5             | 6             | 0           | -1.075215               | -1.305990 | -0.011214 |
| 6             | 6             | 0           | -1.971240               | -0.236342 | -0.010468 |
| 7             | 6             | 0           | 2.266458                | 0.475246  | 0.007264  |
| 8             | 8             | 0           | 3.156593                | -0.354474 | 0.011806  |
| 9             | 6             | 0           | 1.193507                | -2.341567 | -0.005706 |
| 10            | 6             | 0           | 0.385926                | 2.746657  | -0.003643 |
| 11            | 6             | 0           | -3.460034               | -0.472410 | 0.016618  |
| 12            | 1             | 0           | 2.539363                | 1.546268  | 0.008982  |
| 13            | 1             | 0           | -2.136280               | 1.903592  | -0.016260 |
| 14            | 1             | 0           | -1.463366               | -2.319788 | -0.019039 |
| 15            | 1             | 0           | 0.582214                | -3.246395 | -0.013295 |
| 16            | 1             | 0           | 1.848237                | -2.363488 | 0.867934  |
| 17            | 1             | 0           | 1.857748                | -2.355024 | -0.872285 |
| 18            | 1             | 0           | -0.475992               | 3.415619  | -0.008916 |
| 19            | 1             | 0           | 0.983146                | 2.987908  | 0.879844  |
| 20            | 1             | 0           | 0.991557                | 2.984612  | -0.882273 |
| 21            | 1             | 0           | -3.721080               | -1.430134 | -0.438512 |
| 22            | 1             | 0           | -3.999426               | 0.317475  | -0.511052 |
| 23            | 1             | 0           | -3.829272               | -0.487802 | 1.048085  |

|                                              |                             |
|----------------------------------------------|-----------------------------|
| Zero-point correction=                       | 0.191657 (Hartree/Particle) |
| Thermal correction to Energy=                | 0.203121                    |
| Thermal correction to Enthalpy=              | 0.204065                    |
| Thermal correction to Gibbs Free Energy=     | 0.153799                    |
| Sum of electronic and zero-point Energies=   | -463.454637                 |
| Sum of electronic and thermal Energies=      | -463.443173                 |
| Sum of electronic and thermal Enthalpies=    | -463.442229                 |
| Sum of electronic and thermal Free Energies= | -463.492495                 |

**ELR**

Standard orientation:

| Center Number | Atomic Number | Atomic Type | Coordinates (Angstroms) |           |           |
|---------------|---------------|-------------|-------------------------|-----------|-----------|
|               |               |             | X                       | Y         | Z         |
| 1             | 6             | 0           | 4.664818                | 0.887574  | -0.136635 |
| 2             | 1             | 0           | 5.630238                | 0.744727  | -0.630465 |
| 3             | 1             | 0           | 4.175826                | 1.755542  | -0.586783 |
| 4             | 1             | 0           | 4.858662                | 1.122055  | 0.914332  |
| 5             | 6             | 0           | 3.787139                | -0.370405 | -0.270614 |
| 6             | 1             | 0           | 4.340053                | -1.223758 | 0.146740  |
| 7             | 1             | 0           | 3.624054                | -0.596716 | -1.329585 |
| 8             | 6             | 0           | 2.467507                | -0.246041 | 0.426910  |
| 9             | 1             | 0           | 2.500188                | -0.050852 | 1.498437  |
| 10            | 6             | 0           | 1.247542                | -0.351465 | -0.178457 |
| 11            | 1             | 0           | 1.226449                | -0.544718 | -1.251309 |
| 12            | 6             | 0           | 0.000000                | -0.234339 | 0.473093  |



|    |   |   |           |           |           |
|----|---|---|-----------|-----------|-----------|
| 13 | 6 | 0 | -1.247542 | -0.351465 | -0.178457 |
| 14 | 1 | 0 | -1.226449 | -0.544718 | -1.251309 |
| 15 | 6 | 0 | -2.467507 | -0.246041 | 0.426910  |
| 16 | 1 | 0 | -2.500188 | -0.050852 | 1.498436  |
| 17 | 6 | 0 | -3.787139 | -0.370405 | -0.270614 |
| 18 | 1 | 0 | -3.624054 | -0.596716 | -1.329585 |
| 19 | 1 | 0 | -4.340052 | -1.223758 | 0.146739  |
| 20 | 6 | 0 | -4.664818 | 0.887574  | -0.136634 |
| 21 | 1 | 0 | -5.630238 | 0.744726  | -0.630464 |
| 22 | 1 | 0 | -4.858662 | 1.122055  | 0.914332  |
| 23 | 1 | 0 | -4.175826 | 1.755542  | -0.586783 |
| 24 | 1 | 0 | 0.000000  | -0.042477 | 1.544251  |

---

|                                              |                             |
|----------------------------------------------|-----------------------------|
| Zero-point correction=                       | 0.212482 (Hartree/Particle) |
| Thermal correction to Energy=                | 0.223953                    |
| Thermal correction to Enthalpy=              | 0.224897                    |
| Thermal correction to Gibbs Free Energy=     | 0.173871                    |
| Sum of electronic and zero-point Energies=   | -351.828465                 |
| Sum of electronic and thermal Energies=      | -351.816994                 |
| Sum of electronic and thermal Enthalpies=    | -351.816050                 |
| Sum of electronic and thermal Free Energies= | -351.867075                 |

**EL**

Standard orientation:

---

| Center<br>Number | Atomic<br>Number | Atomic<br>Type | Coordinates (Angstroms) |           |           |
|------------------|------------------|----------------|-------------------------|-----------|-----------|
|                  |                  |                | X                       | Y         | Z         |
| 1                | 6                | 0              | 4.048958                | 0.059700  | 1.204002  |
| 2                | 1                | 0              | 5.041258                | 0.477101  | 1.397118  |
| 3                | 1                | 0              | 3.330437                | 0.578639  | 1.844128  |
| 4                | 1                | 0              | 4.065278                | -0.991726 | 1.507157  |
| 5                | 6                | 0              | 3.667854                | 0.203692  | -0.278405 |
| 6                | 1                | 0              | 4.438541                | -0.285003 | -0.888842 |
| 7                | 1                | 0              | 3.671837                | 1.261314  | -0.562086 |
| 8                | 6                | 0              | 2.327847                | -0.397747 | -0.600115 |
| 9                | 1                | 0              | 2.222267                | -1.463585 | -0.392835 |
| 10               | 6                | 0              | 1.283142                | 0.263938  | -1.096760 |
| 11               | 1                | 0              | 1.383430                | 1.330877  | -1.297955 |
| 12               | 6                | 0              | -0.060674               | -0.344002 | -1.414876 |
| 13               | 1                | 0              | -0.240508               | -0.248053 | -2.496110 |
| 14               | 6                | 0              | -1.197112               | 0.322128  | -0.679073 |
| 15               | 1                | 0              | -1.308991               | 1.394037  | -0.844571 |
| 16               | 6                | 0              | -2.050684               | -0.295012 | 0.137289  |
| 17               | 1                | 0              | -1.931770               | -1.366109 | 0.306795  |
| 18               | 6                | 0              | -3.182646               | 0.364424  | 0.875294  |
| 19               | 1                | 0              | -3.231070               | 1.423263  | 0.600388  |
| 20               | 1                | 0              | -4.132130               | -0.083951 | 0.554586  |
| 21               | 6                | 0              | -3.063597               | 0.226649  | 2.401841  |
| 22               | 1                | 0              | -3.917883               | 0.687370  | 2.905934  |
| 23               | 1                | 0              | -3.027674               | -0.825223 | 2.701745  |
| 24               | 1                | 0              | -2.152250               | 0.707391  | 2.767445  |
| 25               | 1                | 0              | -0.048228               | -1.415160 | -1.191743 |

---

|                                              |                             |
|----------------------------------------------|-----------------------------|
| Zero-point correction=                       | 0.225787 (Hartree/Particle) |
| Thermal correction to Energy=                | 0.237385                    |
| Thermal correction to Enthalpy=              | 0.238329                    |
| Thermal correction to Gibbs Free Energy=     | 0.187174                    |
| Sum of electronic and zero-point Energies=   | -352.438040                 |
| Sum of electronic and thermal Energies=      | -352.426442                 |
| Sum of electronic and thermal Enthalpies=    | -352.425497                 |
| Sum of electronic and thermal Free Energies= | -352.476652                 |

**B**

Standard orientation:

---

| Center<br>Number | Atomic<br>Number | Atomic<br>Type | Coordinates (Angstroms) |           |           |
|------------------|------------------|----------------|-------------------------|-----------|-----------|
|                  |                  |                | X                       | Y         | Z         |
| 1                | 6                | 0              | -1.729535               | 1.063648  | 0.000005  |
| 2                | 6                | 0              | -0.354916               | 1.286968  | -0.000004 |
| 3                | 6                | 0              | 0.534008                | 0.206633  | -0.000008 |
| 4                | 6                | 0              | 0.038300                | -1.104591 | -0.000006 |
| 5                | 6                | 0              | -1.332438               | -1.326057 | 0.000000  |
| 6                | 6                | 0              | -2.216565               | -0.242619 | 0.000006  |
| 7                | 1                | 0              | -2.417789               | 1.900960  | 0.000008  |
| 8                | 1                | 0              | 0.034559                | 2.300467  | -0.000005 |
| 9                | 1                | 0              | 0.742996                | -1.927881 | -0.000011 |
| 10               | 1                | 0              | -1.718914               | -2.338870 | 0.000001  |
| 11               | 1                | 0              | -3.286412               | -0.419397 | 0.000010  |
| 12               | 6                | 0              | 1.992144                | 0.463642  | -0.000016 |
| 13               | 8                | 0              | 2.848569                | -0.392487 | 0.000014  |
| 14               | 1                | 0              | 2.271023                | 1.538872  | 0.000028  |

---

|                                              |                             |
|----------------------------------------------|-----------------------------|
| Zero-point correction=                       | 0.109359 (Hartree/Particle) |
| Thermal correction to Energy=                | 0.115692                    |
| Thermal correction to Enthalpy=              | 0.116636                    |
| Thermal correction to Gibbs Free Energy=     | 0.078770                    |
| Sum of electronic and zero-point Energies=   | -345.559828                 |
| Sum of electronic and thermal Energies=      | -345.553495                 |
| Sum of electronic and thermal Enthalpies=    | -345.552551                 |
| Sum of electronic and thermal Free Energies= | -345.590417                 |

**BR**

Standard orientation:

---

| Center<br>Number | Atomic<br>Number | Atomic<br>Type | Coordinates (Angstroms) |           |           |
|------------------|------------------|----------------|-------------------------|-----------|-----------|
|                  |                  |                | X                       | Y         | Z         |
| 1                | 6                | 0              | -1.706751               | -1.055224 | -0.000004 |
| 2                | 6                | 0              | -0.336632               | -1.301557 | -0.000003 |
| 3                | 6                | 0              | 0.563836                | -0.231592 | 0.000009  |

|    |   |   |           |           |           |
|----|---|---|-----------|-----------|-----------|
| 4  | 6 | 0 | 0.090264  | 1.090390  | 0.000005  |
| 5  | 6 | 0 | -1.277842 | 1.329972  | 0.000000  |
| 6  | 6 | 0 | -2.174936 | 0.258201  | -0.000003 |
| 7  | 1 | 0 | -2.407288 | -1.882040 | -0.000010 |
| 8  | 1 | 0 | 0.048581  | -2.314667 | 0.000001  |
| 9  | 1 | 0 | 0.801475  | 1.908044  | 0.000007  |
| 10 | 1 | 0 | -1.650191 | 2.348160  | 0.000002  |
| 11 | 1 | 0 | -3.242118 | 0.450109  | -0.000007 |
| 12 | 6 | 0 | 2.016978  | -0.511122 | 0.000021  |
| 13 | 8 | 0 | 2.925004  | 0.251998  | -0.000018 |

---

|                                              |                             |
|----------------------------------------------|-----------------------------|
| Zero-point correction=                       | 0.097125 (Hartree/Particle) |
| Thermal correction to Energy=                | 0.103491                    |
| Thermal correction to Enthalpy=              | 0.104436                    |
| Thermal correction to Gibbs Free Energy=     | 0.065795                    |
| Sum of electronic and zero-point Energies=   | -344.919155                 |
| Sum of electronic and thermal Energies=      | -344.912788                 |
| Sum of electronic and thermal Enthalpies=    | -344.911844                 |
| Sum of electronic and thermal Free Energies= | -344.950484                 |

**TS: TMBR+EL**

Standard orientation:

---

| Center<br>Number | Atomic<br>Number | Atomic<br>Type | Coordinates (Angstroms) |           |           |
|------------------|------------------|----------------|-------------------------|-----------|-----------|
|                  |                  |                | X                       | Y         | Z         |
| 1                | 6                | 0              | 5.880246                | -2.776535 | -0.575384 |
| 2                | 1                | 0              | 6.431260                | -3.515684 | -1.164067 |
| 3                | 1                | 0              | 6.273058                | -1.785445 | -0.817916 |
| 4                | 1                | 0              | 6.090244                | -2.967894 | 0.481292  |
| 5                | 6                | 0              | 4.371149                | -2.854974 | -0.862343 |
| 6                | 1                | 0              | 4.030430                | -3.879111 | -0.657749 |
| 7                | 1                | 0              | 4.185985                | -2.673706 | -1.926575 |
| 8                | 6                | 0              | 3.564389                | -1.891610 | -0.039810 |
| 9                | 1                | 0              | 3.642002                | -2.002324 | 1.041981  |
| 10               | 6                | 0              | 2.786910                | -0.914280 | -0.533035 |
| 11               | 1                | 0              | 2.718227                | -0.806714 | -1.616118 |
| 12               | 6                | 0              | 1.969321                | 0.011222  | 0.268578  |
| 13               | 6                | 0              | 1.646542                | 1.320919  | -0.320835 |
| 14               | 1                | 0              | 1.564915                | 1.353682  | -1.408223 |
| 15               | 6                | 0              | 1.415073                | 2.451171  | 0.365436  |
| 16               | 1                | 0              | 1.508075                | 2.431995  | 1.451766  |
| 17               | 6                | 0              | 1.053325                | 3.775942  | -0.242731 |
| 18               | 1                | 0              | 0.952618                | 3.665740  | -1.327787 |
| 19               | 1                | 0              | 0.068458                | 4.089010  | 0.129729  |
| 20               | 6                | 0              | 2.071195                | 4.884222  | 0.075669  |
| 21               | 1                | 0              | 1.759576                | 5.839897  | -0.355676 |
| 22               | 1                | 0              | 2.176051                | 5.024248  | 1.155843  |
| 23               | 1                | 0              | 3.057769                | 4.634627  | -0.323971 |
| 24               | 1                | 0              | 2.283816                | 0.069687  | 1.313680  |
| 25               | 1                | 0              | 0.837904                | -0.607997 | 0.492248  |
| 26               | 6                | 0              | -3.071675               | -1.455146 | -1.245135 |
| 27               | 6                | 0              | -1.784913               | -1.413060 | -0.710273 |
| 28               | 6                | 0              | -1.630951               | -1.269663 | 0.686858  |
| 29               | 6                | 0              | -2.771227               | -1.161887 | 1.526363  |
| 30               | 6                | 0              | -4.033082               | -1.182352 | 0.934136  |

|                                              |   |   |           |                             |           |
|----------------------------------------------|---|---|-----------|-----------------------------|-----------|
| 31                                           | 6 | 0 | -4.207524 | -1.335112                   | -0.443375 |
| 32                                           | 6 | 0 | -0.267740 | -1.215574                   | 1.264081  |
| 33                                           | 8 | 0 | 0.048917  | -1.421693                   | 2.402420  |
| 34                                           | 6 | 0 | -2.676020 | -1.019188                   | 3.025385  |
| 35                                           | 6 | 0 | -0.603980 | -1.532331                   | -1.645202 |
| 36                                           | 6 | 0 | -5.589914 | -1.399146                   | -1.042313 |
| 37                                           | 1 | 0 | -3.189523 | -1.580681                   | -2.317025 |
| 38                                           | 1 | 0 | -4.907846 | -1.082722                   | 1.569794  |
| 39                                           | 1 | 0 | -3.664167 | -0.825534                   | 3.447021  |
| 40                                           | 1 | 0 | -2.007258 | -0.206320                   | 3.316784  |
| 41                                           | 1 | 0 | -2.273170 | -1.924672                   | 3.484817  |
| 42                                           | 1 | 0 | -0.929876 | -1.900011                   | -2.620057 |
| 43                                           | 1 | 0 | -0.129415 | -0.559413                   | -1.800056 |
| 44                                           | 1 | 0 | 0.161538  | -2.209726                   | -1.264102 |
| 45                                           | 1 | 0 | -5.988272 | -2.418271                   | -0.986385 |
| 46                                           | 1 | 0 | -5.583923 | -1.106173                   | -2.094252 |
| 47                                           | 1 | 0 | -6.286015 | -0.748173                   | -0.508237 |
| -----                                        |   |   |           |                             |           |
| Zero-point correction=                       |   |   |           | 0.400733 (Hartree/Particle) |           |
| Thermal correction to Energy=                |   |   |           | 0.425136                    |           |
| Thermal correction to Enthalpy=              |   |   |           | 0.426081                    |           |
| Thermal correction to Gibbs Free Energy=     |   |   |           | 0.341921                    |           |
| Sum of electronic and zero-point Energies=   |   |   |           | -815.239812                 |           |
| Sum of electronic and thermal Energies=      |   |   |           | -815.215408                 |           |
| Sum of electronic and thermal Enthalpies=    |   |   |           | -815.214464                 |           |
| Sum of electronic and thermal Free Energies= |   |   |           | -815.298623                 |           |

**TS: APAR+EL**

Standard orientation:

| Center<br>Number | Atomic<br>Number | Atomic<br>Type | Coordinates (Angstroms) |           |           |
|------------------|------------------|----------------|-------------------------|-----------|-----------|
|                  |                  |                | X                       | Y         | Z         |
| 1                | 6                | 0              | 6.729204                | 1.064784  | -0.616084 |
| 2                | 1                | 0              | 7.586436                | 0.726682  | -1.204679 |
| 3                | 1                | 0              | 6.689884                | 2.156123  | -0.667507 |
| 4                | 1                | 0              | 6.909517                | 0.786084  | 0.426498  |
| 5                | 6                | 0              | 5.424030                | 0.440917  | -1.138996 |
| 6                | 1                | 0              | 5.523900                | -0.652527 | -1.114840 |
| 7                | 1                | 0              | 5.271878                | 0.716233  | -2.187485 |
| 8                | 6                | 0              | 4.221634                | 0.834538  | -0.334239 |
| 9                | 1                | 0              | 4.254226                | 0.590037  | 0.727572  |
| 10               | 6                | 0              | 3.135810                | 1.463119  | -0.818990 |
| 11               | 1                | 0              | 3.100102                | 1.702938  | -1.880949 |
| 12               | 6                | 0              | 1.955496                | 1.819498  | -0.034812 |
| 13               | 6                | 0              | 1.130715                | 2.941928  | -0.475461 |
| 14               | 1                | 0              | 1.115894                | 3.137677  | -1.547050 |
| 15               | 6                | 0              | 0.385952                | 3.717926  | 0.332706  |
| 16               | 1                | 0              | 0.404466                | 3.523966  | 1.405384  |
| 17               | 6                | 0              | -0.456577               | 4.874932  | -0.117315 |
| 18               | 1                | 0              | -0.423105               | 4.951658  | -1.208730 |
| 19               | 1                | 0              | -1.504423               | 4.682533  | 0.149189  |
| 20               | 6                | 0              | -0.028640               | 6.210102  | 0.516108  |
| 21               | 1                | 0              | -0.685758               | 7.022719  | 0.194413  |
| 22               | 1                | 0              | -0.069667               | 6.159804  | 1.608309  |
| 23               | 1                | 0              | 0.995348                | 6.467295  | 0.232623  |
| 24               | 1                | 0              | 2.081568                | 1.741067  | 1.046020  |

|    |    |   |           |           |           |
|----|----|---|-----------|-----------|-----------|
| 25 | 1  | 0 | 1.120238  | 0.712789  | -0.192254 |
| 26 | 15 | 0 | 0.268984  | -0.713005 | -0.464218 |
| 27 | 8  | 0 | -0.030373 | -0.942420 | -1.925126 |
| 28 | 6  | 0 | -4.448216 | -1.641107 | -0.795448 |
| 29 | 6  | 0 | -3.107017 | -1.657520 | -0.411467 |
| 30 | 6  | 0 | -2.595719 | -0.552806 | 0.304335  |
| 31 | 6  | 0 | -3.437260 | 0.535937  | 0.638490  |
| 32 | 6  | 0 | -4.760448 | 0.513617  | 0.200255  |
| 33 | 6  | 0 | -5.286236 | -0.561342 | -0.518795 |
| 34 | 6  | 0 | -1.177897 | -0.523517 | 0.762842  |
| 35 | 8  | 0 | -0.837289 | -0.218980 | 1.892465  |
| 36 | 6  | 0 | -2.958180 | 1.724321  | 1.440100  |
| 37 | 6  | 0 | -2.274938 | -2.876031 | -0.737400 |
| 38 | 6  | 0 | -6.716180 | -0.545663 | -0.998094 |
| 39 | 6  | 0 | 1.895309  | -2.932898 | -0.644583 |
| 40 | 6  | 0 | 2.753756  | -3.927737 | -0.182466 |
| 41 | 6  | 0 | 3.075759  | -4.001443 | 1.172097  |
| 42 | 6  | 0 | 2.537147  | -3.075802 | 2.066665  |
| 43 | 6  | 0 | 1.680157  | -2.075916 | 1.613797  |
| 44 | 6  | 0 | 1.348593  | -2.005035 | 0.252482  |
| 45 | 1  | 0 | -5.402002 | 1.357219  | 0.436454  |
| 46 | 1  | 0 | -4.847624 | -2.500445 | -1.325186 |
| 47 | 1  | 0 | -3.694627 | 2.528805  | 1.393201  |
| 48 | 1  | 0 | -2.005296 | 2.111084  | 1.071586  |
| 49 | 1  | 0 | -2.805870 | 1.457302  | 2.488160  |
| 50 | 1  | 0 | -2.921334 | -3.708107 | -1.022554 |
| 51 | 1  | 0 | -1.595996 | -2.668461 | -1.568751 |
| 52 | 1  | 0 | -1.672541 | -3.203349 | 0.113868  |
| 53 | 1  | 0 | -6.789977 | -0.059910 | -1.977390 |
| 54 | 1  | 0 | -7.362135 | 0.005522  | -0.310629 |
| 55 | 1  | 0 | -7.112923 | -1.557733 | -1.104226 |
| 56 | 1  | 0 | 1.636427  | -2.866555 | -1.695116 |
| 57 | 1  | 0 | 3.168498  | -4.646839 | -0.880308 |
| 58 | 1  | 0 | 3.743342  | -4.777268 | 1.530406  |
| 59 | 1  | 0 | 2.783362  | -3.133306 | 3.121232  |
| 60 | 1  | 0 | 1.257195  | -1.365556 | 2.312944  |

---

|                                              |                             |
|----------------------------------------------|-----------------------------|
| Zero-point correction=                       | 0.496940 (Hartree/Particle) |
| Thermal correction to Energy=                | 0.529226                    |
| Thermal correction to Enthalpy=              | 0.530170                    |
| Thermal correction to Gibbs Free Energy=     | 0.426606                    |
| Sum of electronic and zero-point Energies=   | -1463.504412                |
| Sum of electronic and thermal Energies=      | -1463.472127                |
| Sum of electronic and thermal Enthalpies=    | -1463.471183                |
| Sum of electronic and thermal Free Energies= | -1463.574747                |

**TS: BR+EL**

Standard orientation:

---

| Center<br>Number | Atomic<br>Number | Atomic<br>Type | Coordinates (Angstroms) |          |           |
|------------------|------------------|----------------|-------------------------|----------|-----------|
|                  |                  |                | X                       | Y        | Z         |
| 1                | 6                | 0              | -0.713688               | 5.450291 | 0.020289  |
| 2                | 1                | 0              | -0.433476               | 6.382732 | -0.478004 |
| 3                | 1                | 0              | -1.802569               | 5.358976 | -0.014097 |

|    |   |   |           |           |           |
|----|---|---|-----------|-----------|-----------|
| 4  | 1 | 0 | -0.420149 | 5.532813  | 1.071318  |
| 5  | 6 | 0 | -0.039621 | 4.241666  | -0.650496 |
| 6  | 1 | 0 | 1.047453  | 4.399505  | -0.643379 |
| 7  | 1 | 0 | -0.336388 | 4.187803  | -1.703107 |
| 8  | 6 | 0 | -0.357933 | 2.938548  | 0.026615  |
| 9  | 1 | 0 | -0.076711 | 2.865274  | 1.078378  |
| 10 | 6 | 0 | -0.977051 | 1.897480  | -0.549025 |
| 11 | 1 | 0 | -1.272418 | 1.984410  | -1.595100 |
| 12 | 6 | 0 | -1.265365 | 0.603046  | 0.097852  |
| 13 | 6 | 0 | -2.521974 | -0.073880 | -0.267971 |
| 14 | 1 | 0 | -2.843944 | 0.036900  | -1.303309 |
| 15 | 6 | 0 | -3.256149 | -0.840595 | 0.552284  |
| 16 | 1 | 0 | -2.938158 | -0.952370 | 1.589601  |
| 17 | 6 | 0 | -4.513161 | -1.565826 | 0.166909  |
| 18 | 1 | 0 | -4.716814 | -1.405063 | -0.896762 |
| 19 | 1 | 0 | -4.357960 | -2.645912 | 0.292253  |
| 20 | 6 | 0 | -5.733718 | -1.145345 | 1.002761  |
| 21 | 1 | 0 | -6.620156 | -1.720419 | 0.720179  |
| 22 | 1 | 0 | -5.556286 | -1.309701 | 2.070098  |
| 23 | 1 | 0 | -5.957045 | -0.084192 | 0.862757  |
| 24 | 1 | 0 | -1.081319 | 0.610736  | 1.175764  |
| 25 | 6 | 0 | 3.731800  | -0.081520 | 0.953474  |
| 26 | 6 | 0 | 2.427817  | -0.123898 | 0.466377  |
| 27 | 6 | 0 | 1.994022  | -1.229496 | -0.272400 |
| 28 | 6 | 0 | 2.871281  | -2.296561 | -0.520626 |
| 29 | 6 | 0 | 4.168977  | -2.252494 | -0.027754 |
| 30 | 6 | 0 | 4.599210  | -1.145161 | 0.708785  |
| 31 | 1 | 0 | 4.071338  | 0.776794  | 1.521659  |
| 32 | 1 | 0 | 1.746122  | 0.699813  | 0.643240  |
| 33 | 1 | 0 | 2.518120  | -3.144484 | -1.095885 |
| 34 | 1 | 0 | 4.848934  | -3.076075 | -0.214807 |
| 35 | 1 | 0 | 5.613499  | -1.113500 | 1.091067  |
| 36 | 6 | 0 | 0.602154  | -1.271551 | -0.787033 |
| 37 | 8 | 0 | 0.134308  | -2.102690 | -1.507342 |
| 38 | 1 | 0 | -0.333926 | -0.207281 | -0.313701 |

---

|                                              |                             |
|----------------------------------------------|-----------------------------|
| Zero-point correction=                       | 0.318217 (Hartree/Particle) |
| Thermal correction to Energy=                | 0.337630                    |
| Thermal correction to Enthalpy=              | 0.338574                    |
| Thermal correction to Gibbs Free Energy=     | 0.265419                    |
| Sum of electronic and zero-point Energies=   | -697.345254                 |
| Sum of electronic and thermal Energies=      | -697.325841                 |
| Sum of electronic and thermal Enthalpies=    | -697.324896                 |
| Sum of electronic and thermal Free Energies= | -697.398051                 |

### TS: EL+ELR (thermneutral reaction)

Standard orientation:

---

| Center<br>Number | Atomic<br>Number | Atomic<br>Type | Coordinates (Angstroms) |           |           |
|------------------|------------------|----------------|-------------------------|-----------|-----------|
|                  |                  |                | X                       | Y         | Z         |
| 1                | 6                | 0              | 2.854196                | 0.895850  | -3.381828 |
| 2                | 1                | 0              | 3.066917                | 1.118081  | -4.431514 |
| 3                | 1                | 0              | 2.295248                | 1.736083  | -2.961311 |
| 4                | 1                | 0              | 3.810489                | 0.835079  | -2.853346 |
| 5                | 6                | 0              | 2.060494                | -0.414853 | -3.244687 |

|    |   |   |           |           |           |
|----|---|---|-----------|-----------|-----------|
| 6  | 1 | 0 | 2.631035  | -1.219583 | -3.728400 |
| 7  | 1 | 0 | 1.115277  | -0.334115 | -3.791794 |
| 8  | 6 | 0 | 1.783523  | -0.790512 | -1.817686 |
| 9  | 1 | 0 | 2.657182  | -0.948652 | -1.184464 |
| 10 | 6 | 0 | 0.558886  | -0.916572 | -1.273252 |
| 11 | 1 | 0 | -0.309427 | -0.748403 | -1.910525 |
| 12 | 6 | 0 | 0.278300  | -1.308719 | 0.105690  |
| 13 | 6 | 0 | -0.985386 | -0.894527 | 0.712339  |
| 14 | 1 | 0 | -1.811834 | -0.712216 | 0.025179  |
| 15 | 6 | 0 | -1.213712 | -0.774116 | 2.032806  |
| 16 | 1 | 0 | -0.389587 | -0.950751 | 2.724324  |
| 17 | 6 | 0 | -2.524839 | -0.384633 | 2.651913  |
| 18 | 1 | 0 | -3.279657 | -0.265322 | 1.867482  |
| 19 | 1 | 0 | -2.876574 | -1.199838 | 3.299080  |
| 20 | 6 | 0 | -2.437992 | 0.900955  | 3.492228  |
| 21 | 1 | 0 | -3.400996 | 1.132563  | 3.956317  |
| 22 | 1 | 0 | -1.698097 | 0.799119  | 4.291981  |
| 23 | 1 | 0 | -2.143546 | 1.753045  | 2.873727  |
| 24 | 1 | 0 | 1.138800  | -1.266931 | 0.776505  |
| 25 | 6 | 0 | 2.650420  | -6.371792 | 3.539193  |
| 26 | 1 | 0 | 2.845963  | -6.602073 | 4.590473  |
| 27 | 1 | 0 | 2.056470  | -7.186217 | 3.115905  |
| 28 | 1 | 0 | 3.611828  | -6.355279 | 3.016863  |
| 29 | 6 | 0 | 1.918585  | -5.026244 | 3.395323  |
| 30 | 1 | 0 | 2.522013  | -4.248092 | 3.882636  |
| 31 | 1 | 0 | 0.966680  | -5.062600 | 3.935517  |
| 32 | 6 | 0 | 1.669817  | -4.639674 | 1.966014  |
| 33 | 1 | 0 | 2.554430  | -4.524272 | 1.338788  |
| 34 | 6 | 0 | 0.456584  | -4.455283 | 1.412714  |
| 35 | 1 | 0 | -0.423276 | -4.580533 | 2.043963  |
| 36 | 6 | 0 | 0.205796  | -4.050900 | 0.031565  |
| 37 | 6 | 0 | -1.073665 | -4.398905 | -0.583594 |
| 38 | 1 | 0 | -1.914175 | -4.533795 | 0.097413  |
| 39 | 6 | 0 | -1.297546 | -4.512193 | -1.905437 |
| 40 | 1 | 0 | -0.459469 | -4.382775 | -2.590580 |
| 41 | 6 | 0 | -2.622251 | -4.833559 | -2.534608 |
| 42 | 1 | 0 | -3.389188 | -4.910169 | -1.756673 |
| 43 | 1 | 0 | -2.924598 | -4.003100 | -3.187333 |
| 44 | 6 | 0 | -2.596127 | -6.124796 | -3.370468 |
| 45 | 1 | 0 | -3.565619 | -6.306300 | -3.843275 |
| 46 | 1 | 0 | -1.844185 | -6.065140 | -4.163164 |
| 47 | 1 | 0 | -2.353456 | -6.989223 | -2.746638 |
| 48 | 1 | 0 | 1.067435  | -4.138536 | -0.633304 |
| 49 | 1 | 0 | 0.175737  | -2.678104 | 0.067873  |

-----

|                                              |                             |
|----------------------------------------------|-----------------------------|
| Zero-point correction=                       | 0.434641 (Hartree/Particle) |
| Thermal correction to Energy=                | 0.458974                    |
| Thermal correction to Enthalpy=              | 0.459918                    |
| Thermal correction to Gibbs Free Energy=     | 0.375167                    |
| Sum of electronic and zero-point Energies=   | -704.233121                 |
| Sum of electronic and thermal Energies=      | -704.208787                 |
| Sum of electronic and thermal Enthalpies=    | -704.207843                 |
| Sum of electronic and thermal Free Energies= | -704.292594                 |

## Part II : Data from M062X 6-311++g(d,p)

## BAPO

Z-Matrix orientation:

| Center<br>Number | Atomic<br>Number | Atomic<br>Type | Coordinates (Angstroms) |           |           |
|------------------|------------------|----------------|-------------------------|-----------|-----------|
|                  |                  |                | X                       | Y         | Z         |
| 1                | 15               | 0              | -0.252244               | -1.108778 | -0.564276 |
| 2                | 8                | 0              | -0.164856               | -0.657668 | -1.985373 |
| 3                | 6                | 0              | -1.181857               | 3.581025  | -0.953806 |
| 4                | 6                | 0              | -0.555559               | 2.414841  | -0.522141 |
| 5                | 6                | 0              | -1.314879               | 1.493564  | 0.210499  |
| 6                | 6                | 0              | -2.670620               | 1.714562  | 0.497201  |
| 7                | 6                | 0              | -3.257135               | 2.884204  | 0.024038  |
| 8                | 6                | 0              | -2.529441               | 3.826672  | -0.701018 |
| 9                | 6                | 0              | -0.695819               | 0.231413  | 0.703483  |
| 10               | 8                | 0              | -0.567136               | -0.063785 | 1.865726  |
| 11               | 6                | 0              | -3.480518               | 0.714151  | 1.285671  |
| 12               | 6                | 0              | 0.902754                | 2.173322  | -0.820459 |
| 13               | 6                | 0              | -3.194484               | 5.073479  | -1.222219 |
| 14               | 6                | 0              | -2.362824               | -2.642583 | -1.364686 |
| 15               | 6                | 0              | -3.424261               | -3.527026 | -1.203709 |
| 16               | 6                | 0              | -3.676892               | -4.087870 | 0.043678  |
| 17               | 6                | 0              | -2.871917               | -3.768345 | 1.135144  |
| 18               | 6                | 0              | -1.809909               | -2.885785 | 0.985564  |
| 19               | 6                | 0              | -1.556676               | -2.326065 | -0.270144 |
| 20               | 1                | 0              | -0.600895               | 4.315599  | -1.503254 |
| 21               | 1                | 0              | -4.307171               | 3.067203  | 0.231247  |
| 22               | 1                | 0              | -4.530008               | 1.007375  | 1.305624  |
| 23               | 1                | 0              | -3.119318               | 0.643738  | 2.313391  |
| 24               | 1                | 0              | -3.415337               | -0.286892 | 0.848773  |
| 25               | 1                | 0              | 1.382490                | 3.094455  | -1.153461 |
| 26               | 1                | 0              | 1.447635                | 1.810640  | 0.056496  |
| 27               | 1                | 0              | 1.003206                | 1.426013  | -1.612346 |
| 28               | 1                | 0              | -2.481786               | 5.895269  | -1.304633 |
| 29               | 1                | 0              | -4.010514               | 5.387565  | -0.569756 |
| 30               | 1                | 0              | -3.612994               | 4.894900  | -2.216662 |
| 31               | 1                | 0              | -2.150080               | -2.187278 | -2.325759 |
| 32               | 1                | 0              | -4.053034               | -3.775123 | -2.050320 |
| 33               | 1                | 0              | -4.504467               | -4.776538 | 0.168315  |
| 34               | 1                | 0              | -3.071565               | -4.209156 | 2.104358  |
| 35               | 1                | 0              | -1.185283               | -2.630992 | 1.832618  |
| 36               | 1                | 0              | 6.154278                | 2.067297  | -0.919257 |
| 37               | 6                | 0              | 5.577548                | 2.123231  | 0.004621  |
| 38               | 6                | 0              | 4.536830                | 1.036799  | 0.065157  |
| 39               | 1                | 0              | 6.266641                | 2.055985  | 0.848187  |
| 40               | 1                | 0              | 5.101851                | 3.107228  | 0.043991  |
| 41               | 6                | 0              | 4.090739                | 0.405593  | -1.089917 |
| 42               | 6                | 0              | 3.999185                | 0.639578  | 1.290792  |
| 43               | 6                | 0              | 3.082930                | -0.558080 | -1.058924 |
| 44               | 1                | 0              | 4.538010                | 0.661439  | -2.046192 |
| 45               | 6                | 0              | 3.010764                | -0.334380 | 1.380325  |
| 46               | 1                | 0              | 4.370463                | 1.093586  | 2.204611  |
| 47               | 6                | 0              | 2.523247                | -0.894239 | 0.180725  |



|    |   |   |          |           |           |
|----|---|---|----------|-----------|-----------|
| 48 | 6 | 0 | 2.691938 | -1.238283 | -2.348384 |
| 49 | 6 | 0 | 2.516541 | -0.777455 | 2.734513  |
| 50 | 6 | 0 | 1.331083 | -1.791308 | 0.265267  |
| 51 | 1 | 0 | 3.595306 | -1.529266 | -2.888926 |
| 52 | 1 | 0 | 2.101165 | -0.572768 | -2.979253 |
| 53 | 1 | 0 | 2.095631 | -2.135840 | -2.184617 |
| 54 | 1 | 0 | 2.921879 | -0.127865 | 3.510290  |
| 55 | 1 | 0 | 1.427991 | -0.757393 | 2.799669  |
| 56 | 1 | 0 | 2.836429 | -1.801538 | 2.936706  |
| 57 | 8 | 0 | 1.255178 | -2.793211 | 0.921450  |

-----

Zero-point correction= 0.464935  
(Hartree/Particle)  
Thermal correction to Energy= 0.495865  
Thermal correction to Enthalpy= 0.496810  
Thermal correction to Gibbs Free Energy= 0.401126  
Sum of electronic and zero-point Energies= -1573.406638  
Sum of electronic and thermal Energies= -1573.375708  
Sum of electronic and thermal Enthalpies= -1573.374764  
Sum of electronic and thermal Free Energies= -1573.470447  
SCF Done: E(RM062X) = -1573.87157335  
Excited State 1: Triplet-A 2.6606 eV 466.00 nm f=0.0000 <S\*\*2>=2.000  
Excited State 3: Singlet-A 3.0719 eV 403.60 nm f=0.0074 <S\*\*2>=0.000

### TPO

Input orientation:

| Center<br>Number | Atomic<br>Number | Atomic<br>Type | Coordinates (Angstroms) |           |           |
|------------------|------------------|----------------|-------------------------|-----------|-----------|
|                  |                  |                | X                       | Y         | Z         |
| 1                | 15               | 0              | -0.779984               | -0.074945 | -0.584390 |
| 2                | 8                | 0              | -0.251698               | -0.292937 | -1.964514 |
| 3                | 6                | 0              | 3.792623                | -1.363289 | -0.445239 |
| 4                | 6                | 0              | 2.433920                | -1.285260 | -0.153545 |
| 5                | 6                | 0              | 1.953457                | -0.118163 | 0.455889  |
| 6                | 6                | 0              | 2.805857                | 0.955736  | 0.761291  |
| 7                | 6                | 0              | 4.150473                | 0.842147  | 0.422567  |
| 8                | 6                | 0              | 4.660736                | -0.307379 | -0.178594 |
| 9                | 6                | 0              | 0.511430                | 0.009576  | 0.800367  |
| 10               | 8                | 0              | 0.099306                | 0.272341  | 1.904828  |
| 11               | 6                | 0              | 2.296488                | 2.211319  | 1.426148  |
| 12               | 6                | 0              | 1.528886                | -2.451589 | -0.465742 |
| 13               | 6                | 0              | 6.116503                | -0.395588 | -0.553730 |
| 14               | 6                | 0              | -1.571911               | 2.354304  | -1.547211 |
| 15               | 6                | 0              | -2.172116               | 3.609271  | -1.509431 |
| 16               | 6                | 0              | -2.799863               | 4.045187  | -0.348235 |
| 17               | 6                | 0              | -2.831039               | 3.228382  | 0.779939  |
| 18               | 6                | 0              | -2.235792               | 1.973644  | 0.749729  |
| 19               | 6                | 0              | -1.605310               | 1.535991  | -0.417477 |
| 20               | 1                | 0              | 4.181691                | -2.272389 | -0.893794 |
| 21               | 1                | 0              | 4.818999                | 1.669791  | 0.639597  |
| 22               | 1                | 0              | 3.048570                | 2.998289  | 1.369929  |
| 23               | 1                | 0              | 2.062200                | 2.026693  | 2.476020  |
| 24               | 1                | 0              | 1.381689                | 2.576200  | 0.952284  |
| 25               | 1                | 0              | 2.110560                | -3.370357 | -0.547871 |

|    |   |   |           |           |           |
|----|---|---|-----------|-----------|-----------|
| 26 | 1 | 0 | 0.774226  | -2.605761 | 0.310502  |
| 27 | 1 | 0 | 1.010310  | -2.280253 | -1.412433 |
| 28 | 1 | 0 | 6.469995  | -1.427141 | -0.521780 |
| 29 | 1 | 0 | 6.734091  | 0.203029  | 0.117408  |
| 30 | 1 | 0 | 6.270669  | -0.022417 | -1.570073 |
| 31 | 1 | 0 | -1.077295 | 1.993501  | -2.442296 |
| 32 | 1 | 0 | -2.148368 | 4.244288  | -2.386957 |
| 33 | 1 | 0 | -3.266971 | 5.022705  | -0.319592 |
| 34 | 1 | 0 | -3.320283 | 3.569782  | 1.684299  |
| 35 | 1 | 0 | -2.253137 | 1.346931  | 1.632473  |
| 36 | 6 | 0 | -3.672046 | -3.458685 | 0.561239  |
| 37 | 6 | 0 | -3.231329 | -3.286173 | -0.746572 |
| 38 | 6 | 0 | -3.232718 | -2.600443 | 1.565413  |
| 39 | 6 | 0 | -2.354265 | -2.251747 | -1.054435 |
| 40 | 1 | 0 | -3.566349 | -3.958803 | -1.527102 |
| 41 | 6 | 0 | -2.358198 | -1.561981 | 1.265950  |
| 42 | 1 | 0 | -3.567224 | -2.742777 | 2.586060  |
| 43 | 6 | 0 | -1.924526 | -1.382312 | -0.050289 |
| 44 | 1 | 0 | -4.353733 | -4.266322 | 0.800950  |
| 45 | 1 | 0 | -1.989760 | -2.108784 | -2.065972 |
| 46 | 1 | 0 | -1.999656 | -0.913272 | 2.055805  |

-----

Zero-point correction= 0.372573  
(Hartree/Particle)  
Thermal correction to Energy= 0.396408  
Thermal correction to Enthalpy= 0.397352  
Thermal correction to Gibbs Free Energy= 0.316415  
Sum of electronic and zero-point Energies= -1342.270084  
Sum of electronic and thermal Energies= -1342.246249  
Sum of electronic and thermal Enthalpies= -1342.245305  
Sum of electronic and thermal Free Energies= -1342.326242  
SCF Done: E(RM062X) = -1342.64265720  
Excited State 1: Triplet-A 2.7244 eV 455.09 nm f=0.0000 <S\*\*2>=2.000  
Excited State 2: Singlet-A 3.1347 eV 395.52 nm f=0.0065 <S\*\*2>=0.000

### TPO-L

Standard orientation:

-----

| Center<br>Number | Atomic<br>Number | Atomic<br>Type | Coordinates (Angstroms) |           |           |
|------------------|------------------|----------------|-------------------------|-----------|-----------|
|                  |                  |                | X                       | Y         | Z         |
| 1                | 15               | 0              | -0.969499               | 0.760797  | 0.646546  |
| 2                | 8                | 0              | -0.424194               | 0.939290  | 2.009215  |
| 3                | 6                | 0              | 3.805896                | 0.745924  | 0.582294  |
| 4                | 6                | 0              | 2.491733                | 1.125007  | 0.322072  |
| 5                | 6                | 0              | 1.696665                | 0.268079  | -0.451186 |
| 6                | 6                | 0              | 2.199168                | -0.943827 | -0.954514 |
| 7                | 6                | 0              | 3.509162                | -1.292246 | -0.642118 |
| 8                | 6                | 0              | 4.325924                | -0.461342 | 0.123532  |
| 9                | 6                | 0              | 0.283349                | 0.627115  | -0.753752 |
| 10               | 8                | 0              | -0.169613               | 0.718844  | -1.871366 |
| 11               | 6                | 0              | 1.354326                | -1.864183 | -1.801326 |
| 12               | 6                | 0              | 1.976841                | 2.442853  | 0.845239  |
| 13               | 6                | 0              | 5.735071                | -0.867880 | 0.465111  |
| 14               | 6                | 0              | -2.192389               | -1.466905 | 1.653816  |

-----

|    |   |   |           |           |           |
|----|---|---|-----------|-----------|-----------|
| 15 | 6 | 0 | -2.903826 | -2.661249 | 1.610688  |
| 16 | 6 | 0 | -3.340398 | -3.167185 | 0.391083  |
| 17 | 6 | 0 | -3.064895 | -2.483503 | -0.790657 |
| 18 | 6 | 0 | -2.356478 | -1.288398 | -0.754922 |
| 19 | 6 | 0 | -1.925421 | -0.772959 | 0.471999  |
| 20 | 1 | 0 | 4.438752  | 1.413119  | 1.160374  |
| 21 | 1 | 0 | 3.905453  | -2.232833 | -1.012873 |
| 22 | 1 | 0 | 1.853783  | -2.824793 | -1.927857 |
| 23 | 1 | 0 | 1.176964  | -1.431112 | -2.787615 |
| 24 | 1 | 0 | 0.377713  | -2.045747 | -1.344628 |
| 25 | 1 | 0 | 2.791703  | 3.165356  | 0.910134  |
| 26 | 1 | 0 | 1.205048  | 2.870028  | 0.200413  |
| 27 | 1 | 0 | 1.538745  | 2.308887  | 1.835856  |
| 28 | 1 | 0 | 6.396168  | -0.000454 | 0.501080  |
| 29 | 1 | 0 | 6.131324  | -1.574556 | -0.265392 |
| 30 | 1 | 0 | 5.765853  | -1.349119 | 1.446702  |
| 31 | 1 | 0 | -1.827862 | -1.064674 | 2.592782  |
| 32 | 1 | 0 | -3.111251 | -3.198743 | 2.528215  |
| 33 | 1 | 0 | -3.891813 | -4.099684 | 0.358434  |
| 34 | 1 | 0 | -3.399181 | -2.883317 | -1.740654 |
| 35 | 1 | 0 | -2.126360 | -0.767405 | -1.677892 |
| 36 | 8 | 0 | -1.890574 | 1.987414  | 0.172916  |
| 37 | 6 | 0 | -3.548225 | 3.331083  | -0.871154 |
| 38 | 6 | 0 | -2.957267 | 1.941679  | -0.791294 |
| 39 | 1 | 0 | -2.794677 | 4.044524  | -1.206632 |
| 40 | 1 | 0 | -4.379751 | 3.340496  | -1.578606 |
| 41 | 1 | 0 | -3.914271 | 3.643675  | 0.107406  |
| 42 | 1 | 0 | -3.702195 | 1.213412  | -0.458312 |
| 43 | 1 | 0 | -2.552023 | 1.624220  | -1.754711 |

-----

Zero-point correction= 0.353301  
(Hartree/Particle)  
Thermal correction to Energy= 0.376167  
Thermal correction to Enthalpy= 0.377111  
Thermal correction to Gibbs Free Energy= 0.299669  
Sum of electronic and zero-point Energies= -1265.120956  
Sum of electronic and thermal Energies= -1265.098090  
Sum of electronic and thermal Enthalpies= -1265.097146  
Sum of electronic and thermal Free Energies= -1265.174589  
SCF Done: E(RM062X) = -1265.47425732

Excited State 1: Triplet-A 2.6742 eV 463.63 nm f=0.0000 <S\*\*2>=2.000  
Excited State 2: Singlet-A 3.0973 eV 400.29 nm f=0.0039 <S\*\*2>=0.000
